# Supplementary material for: Innovation for the Sake of Innovation? How Does Robotic Hepatectomy Compare to Laparoscopic or Open Resection for HCC—A Systematic Review and Meta-Analysis
Source: MDPI journal article supplement (doi:10.3390/cancers14143359), 2022-07-10
Supplement: s1 [file s1]

Medline Search strategy:

"robot\*"[All Fields] AND ("liver"[MeSH Terms] OR "liver"[All Fields] OR "livers"[All Fields] OR "liver s"[All Fields] OR ("hepatectomy"[MeSH Terms] OR "hepatectomy"[All Fields] OR "hepatectomies"[All Fields]))
